# Supplementary figures and images for: [Retracted] Silencing of Long Noncoding RNA HLA Complex P5 (HCP5) Suppresses Glioma Progression through the HCP5‐miR‐205‐Vascular Endothelial Growth Factor A Feedback Loop
Source: Hindawi journal article supplement (doi:10.1155/2022/3092063), 2022-01-01

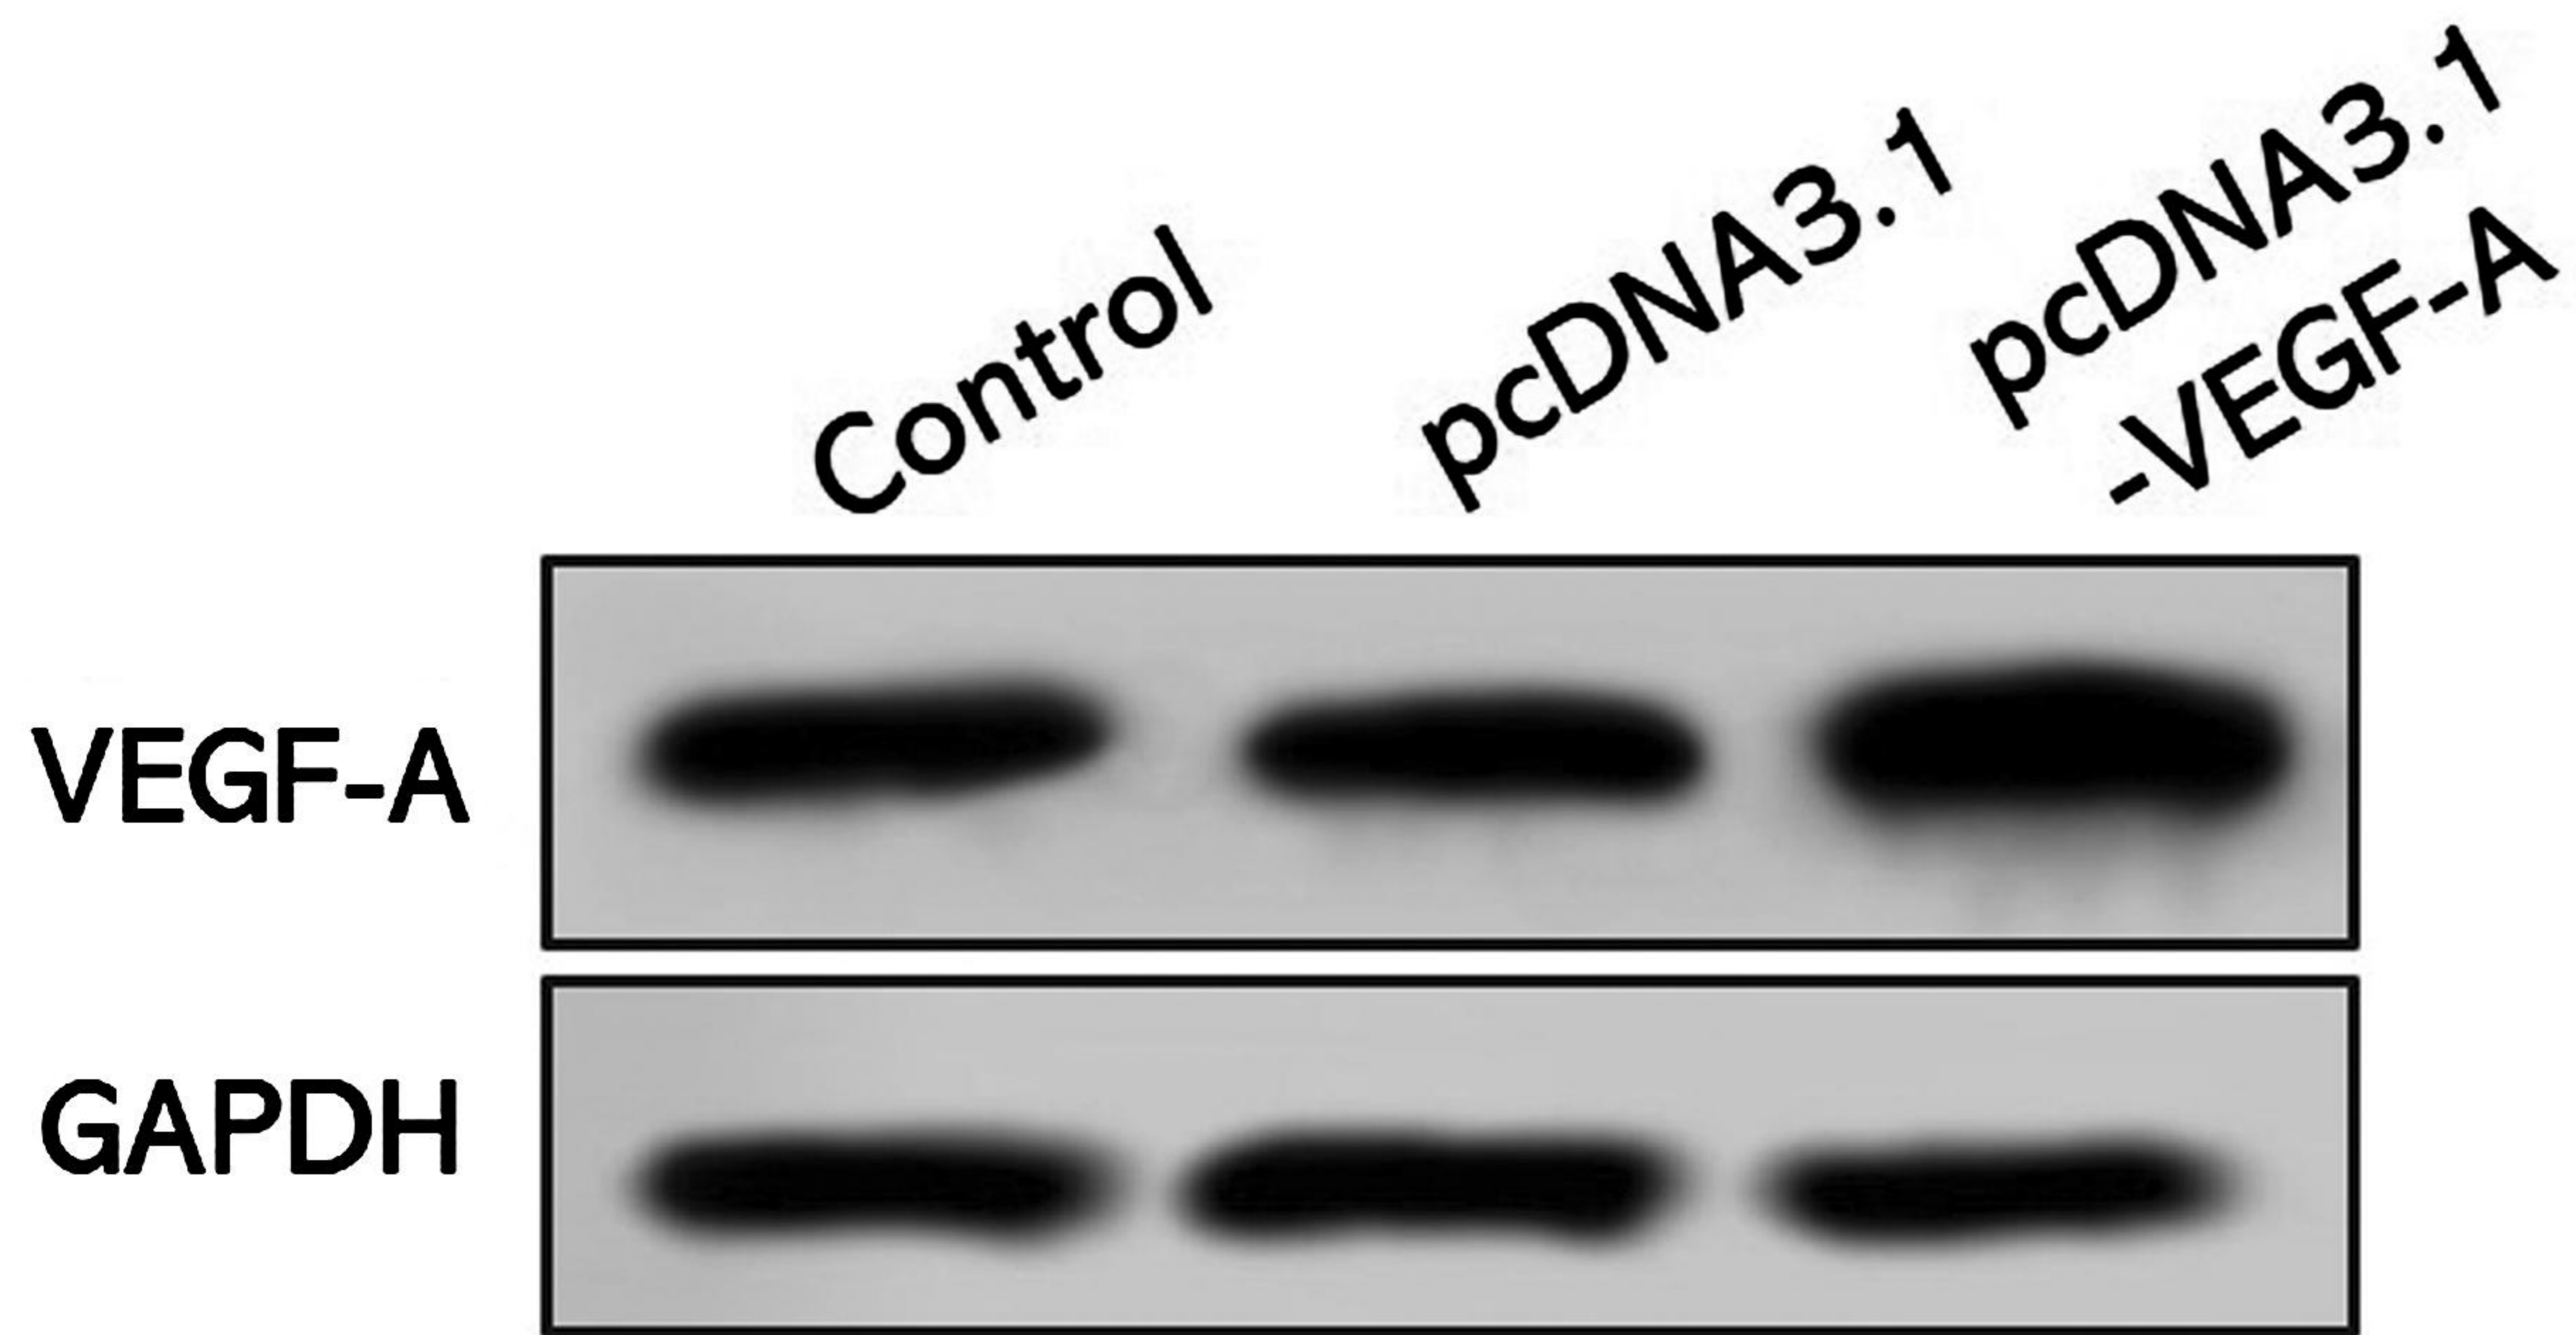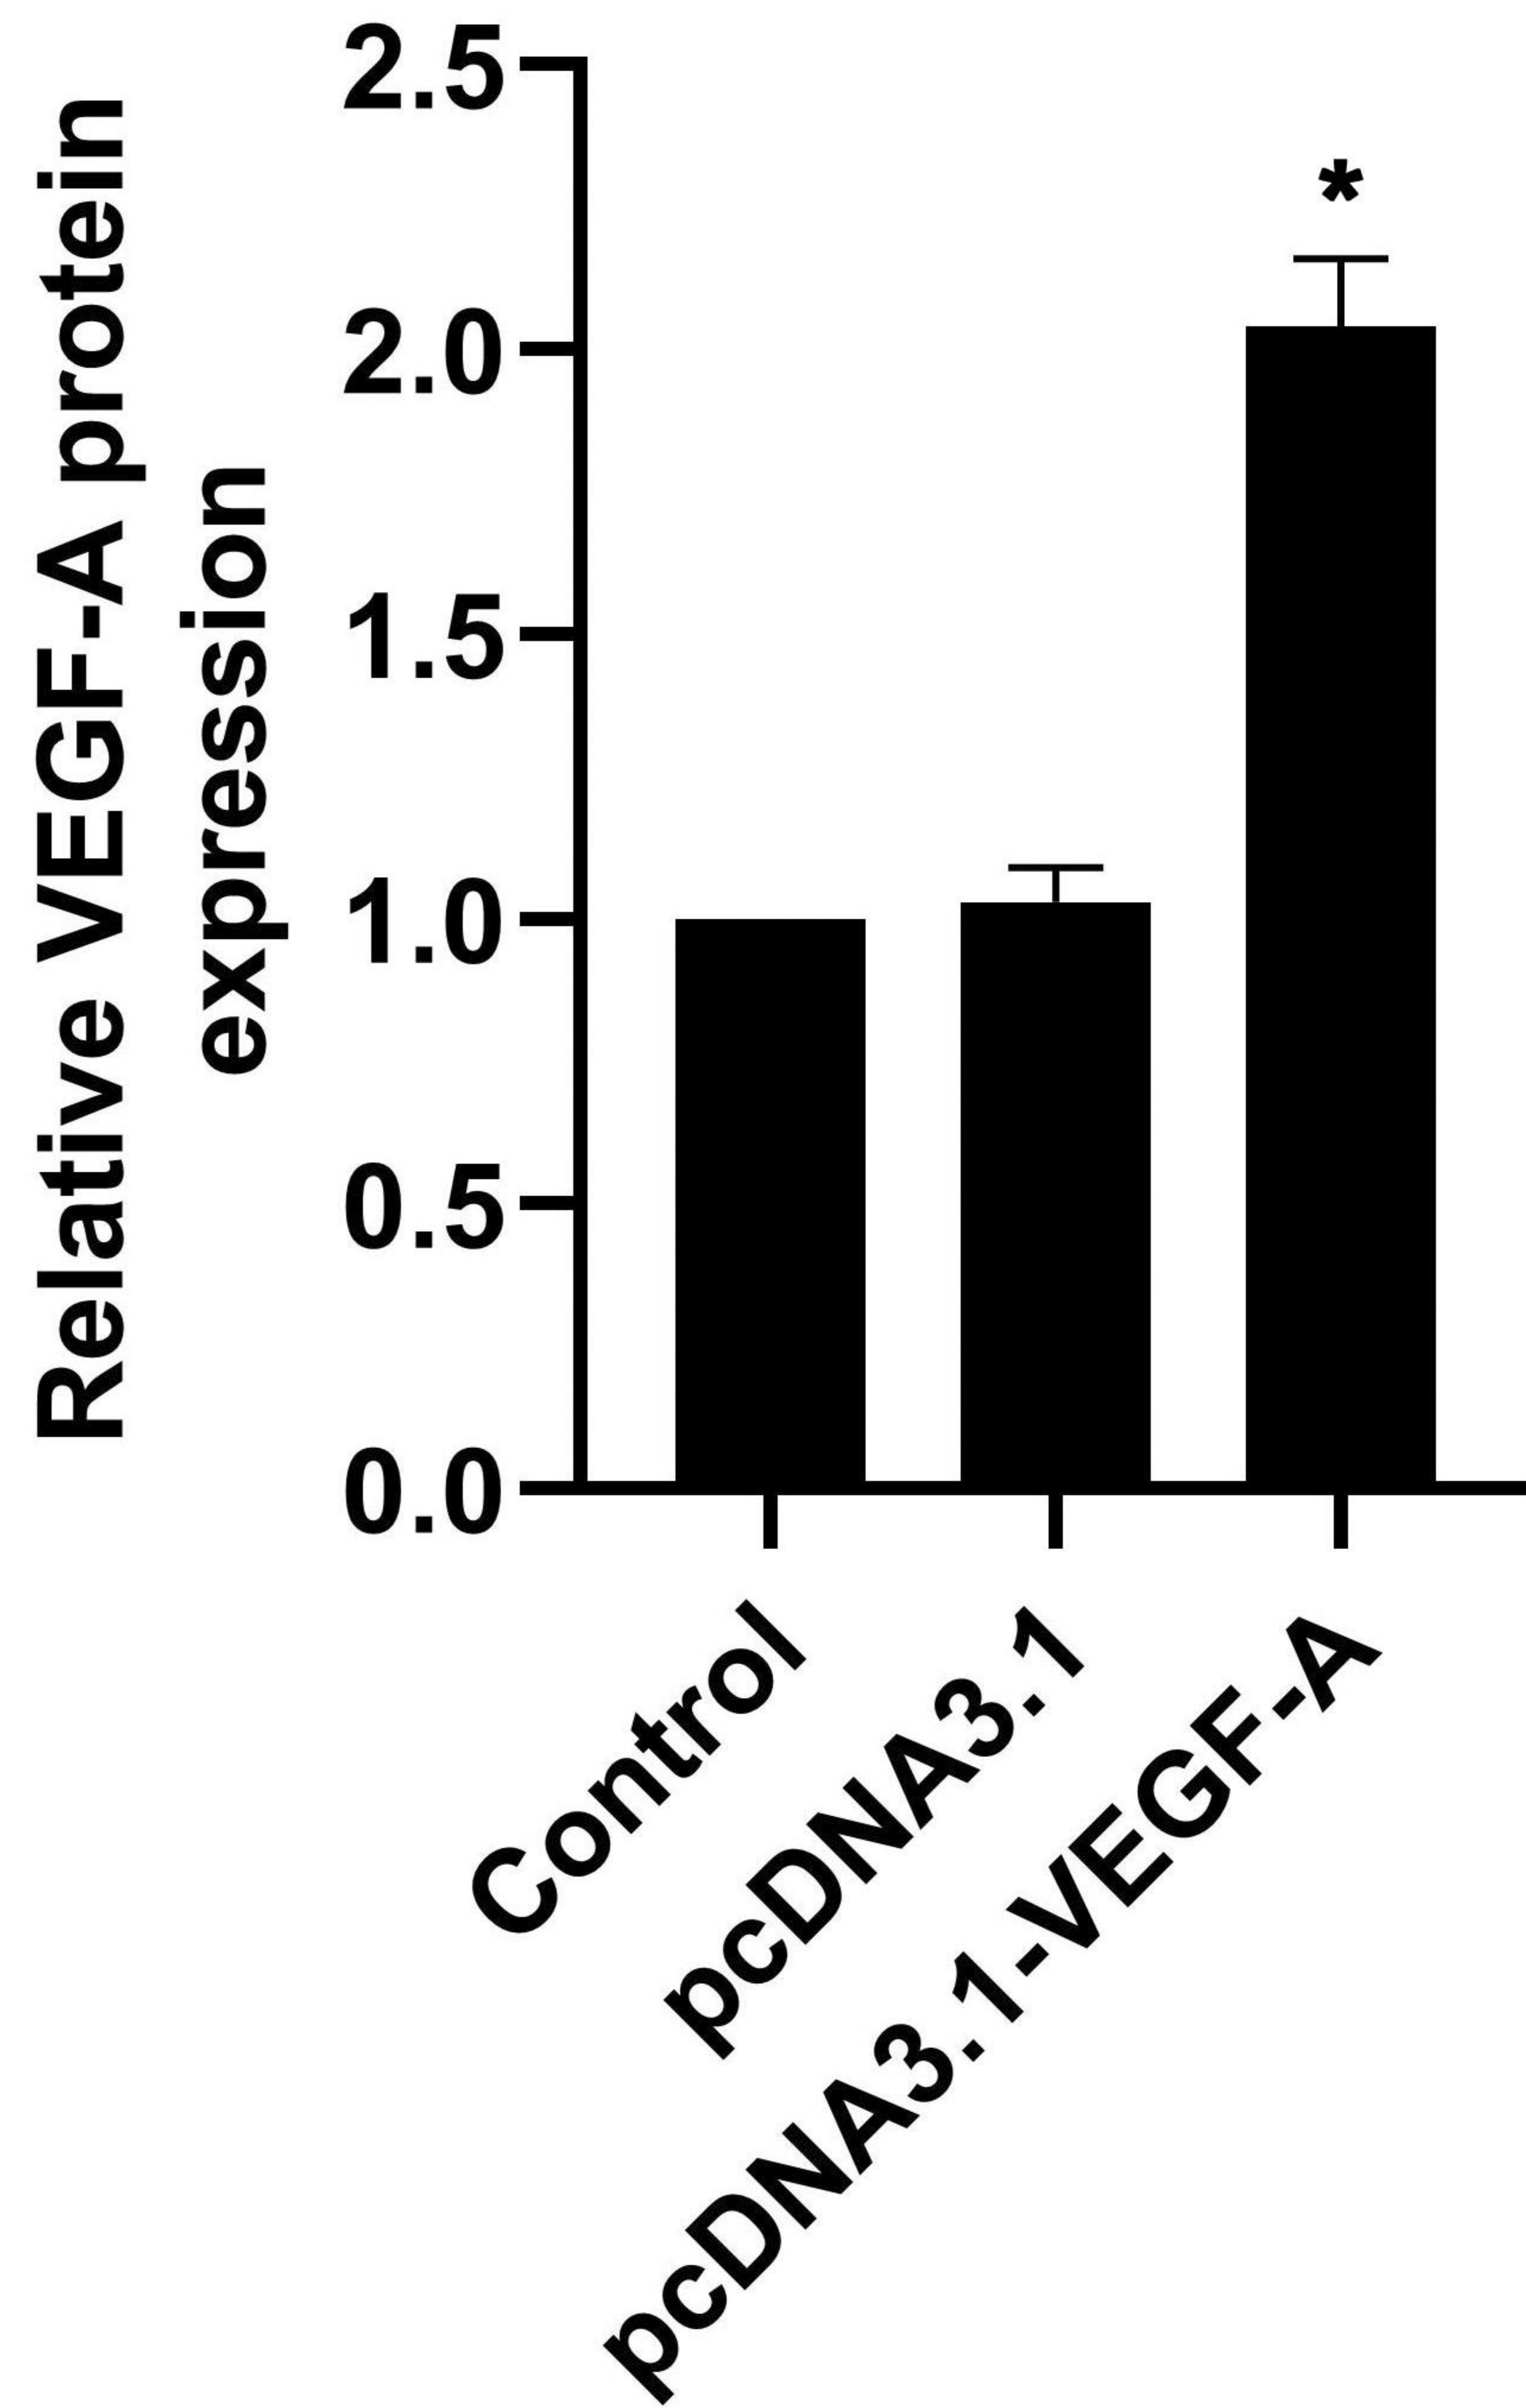

Supplement: f1 [file 3092063.f1.pdf]
